# Supplementary material for: The genetic alteration spectrum of the SWI/SNF complex: The oncogenic roles of BRD9 and ACTL6A
Source: PLoS One. 2019 Sep 10;14(9):e0222305. doi: 10.1371/journal.pone.0222305 (PMC6736241; doi:10.1371/journal.pone.0222305)
Supplement: S2 Table — (XLSX) [file pone.0222305.s003.xlsx]

## Sheet: Sheet1
BRD9 expression	High	low	total
Normal tissue	0	3	3		P value =0.09317
Tumor tissue	12	8	20
total	12	11	23
ACTL6A expression	high	low	total
Normal tissue	5	6	11
Tumor tissue	3	0	3
Total	8	6	14
