# Supplementary material for: The genetic alteration spectrum of the SWI/SNF complex: The oncogenic roles of BRD9 and ACTL6A
Source: PLoS One. 2019 Sep 10;14(9):e0222305. doi: 10.1371/journal.pone.0222305 (PMC6736241; doi:10.1371/journal.pone.0222305)
Supplement: S4 Table — (XLSX) [file pone.0222305.s005.xlsx]

## Sheet: Sheet1
ribosomal	ACC	BLCA	BRCA	CESC	CHOL	COAD	DLBC	ESCA	GBM	HNSC	KICH	KIRC	KIRP	LAML	LGG	LIHC	LUAD	LUSC	OV	PAAD	PCPG	PRAD	READ	SARC	SKCM	STAD	TGCT	THCA	THYM	UCEC	UCS
MRPS2
MRPS7
MRPS11
MRPS15
MRPS16
MRPS21
RPS2
RPS3A
RPS6
RPS7
RPS9
RPS13
RPS14
MRPL4
MRPL12
MRPL9
MRPL19
MRPL21
MRPL24
MRPL27
MRPL28
MRPL30
MRPL34
MRPL36
RPL7
RPL10
RPL10A
RPL11
RPL12
RPL13
RPL18
RPL18A
RPL19
RPL23
RSL24D1
RPL24
RPL26L1
RPL28
RPL29
RPL31
RPL35
RPL35A
UBA52
RPLP0
RPLP1
RPLP2
ribosomal for brd9	ACC	BLCA	BRCA	CESC	CHOL	COAD	DLBC	ESCA	GBM	HNSC	KICH	KIRC	KIRP	LAML	LGG	LIHC	LUAD	LUSC	OV	PAAD	PCPG	PRAD	READ	SARC	SKCM	STAD	TGCT	THCA	THYM	UCEC	UCS
MRPL33
RPL21
RPL36AL
		high
		low

## Sheet: Sheet2
oxidative phosphorylation for actl6a	ACC	BLCA	BRCA	CESC	CHOL	COAD	DLBC	ESCA	GBM	HNSC	KICH	KIRC	KIRP	LAML	LGG	LIHC	LUAD	LUSC	OV	PAAD	PCPG	PRAD	READ	SARC	SKCM	STAD	TGCT	THCA	THYM	UCEC	UCS
NDUFS2
NDUFS3
NDUFS6
NDUFS8
NDUFV1
NDUFV3
NDUFA7
NDUFA8
NDUFAB1
NDUFA11
NDUFA13
NDUFB1
NDUFB8
NDUFB9
NDUFB11
SDHB
SDHC
SDHD
CYC1
UQCRQ
UQCR10
COX5A
COX5B
COX6B1
COX7A2
COX8A
ATP6V1A
ATP6V1C1
ATP6V1E1
ATP6V1F
ATP6V0E1
oxidative phosphorylation for brd9	ACC	BLCA	BRCA	CESC	CHOL	COAD	DLBC	ESCA	GBM	HNSC	KICH	KIRC	KIRP	LAML	LGG	LIHC	LUAD	LUSC	OV	PAAD	PCPG	PRAD	READ	SARC	SKCM	STAD	TGCT	THCA	THYM	UCEC	UCS
NDUFS5
NDUFA1
NDUFB1
NDUFC2
UQCRB
		high
		low
